# Supplementary material for: Evolution to environmental contamination ablates the circadian clock of an aquatic sentinel species
Source: PubMed Central journal article supplement (PMC5723614; doi:10.1002/ece3.3490), 2017-10-28
Supplement: ECE3-7-10339-s001.pdf [file ECE3-7-10339-s001.pdf]

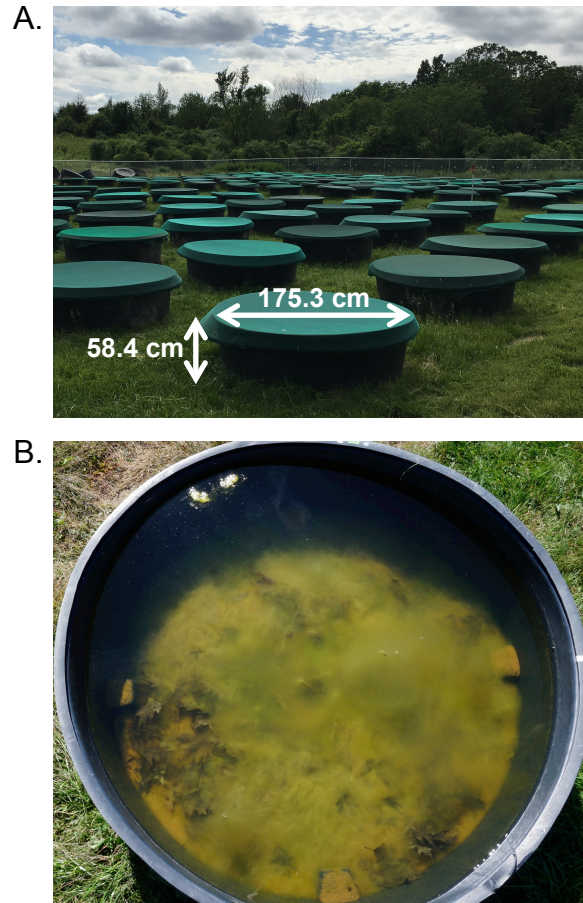

**Supplemental Figure 1. The experimental set up for the evolution of salt tolerance in *D. pulex*** (A) The outdoor experiment involving 1200-L cattle tanks (mesocosms). (B) An example of a mesocosm that contains control *D. pulex* raised in 15 mg Cl<sup>-</sup>/L Lake George water. Photo credit: William D. Hintz.
